# Supplementary material for: Association of CYBA gene (-930 A/G and 242 C/T) polymorphisms with oxidative stress in breast cancer: a case-control study
Source: PeerJ. 2018 Oct 4;6:e5509. doi: 10.7717/peerj.5509 (PMC6174867; doi:10.7717/peerj.5509)
Supplement: Supplemental Information 1 [file peerj-06-5509-s001.xlsx]

## Sheet: Data
SLNO	CODE	AGE	DIET	SMOKER	ALCHOLICS/NON-ALCOHOLICS	C242T	A930G		CODE	AGE	DIET	SMOKER	ALCHOLICS/NON-ALCOHOLICS	C242T	A930G
1	PC1	52	2	2	1	C/C	A/A		CMNJ1	42	2	1	1	C/T	A/A
2	PC2	58	1	2	1	C/C	A/A		CMNJ2	70	1	2	1	C/T	A/G
3	PC3	36	1	2	1	T/T	G/G		CMNJ3	61	1	2	1	C/C	A/A
4	PC4	38	2	2	1	C/T	A/G		CMNJ4	45	2	2	1	T/T	G/G
5	PC5	48	2	2	1	T/T	G/G		CMNJ5	46	2	2	2	C/C	G/G
6	PC6	49	2	1	1	C/C	A/A		CMNJ7	43	2	1	1	C/T	G/G
7	PC9	47	2	2	1	C/C	A/G		CMNJ8	56	2	2	2	C/T	A/G
8	PC11	29	2	2	1	C/C	A/G		CMNJ9	55	2	2	1	C/T	A/G
9	PC13	38	1	2	1	C/C	A/G		CMNJ10	39	1	2	1	C/T	A/A
10	PC14	38	2	2	1	C/C	A/G		CMNJ11	45	2	2	2	C/T	A/G
11	PC16	32	2	2	1	C/C	A/G		CMNJ12	45	2	2	2	C/T	A/A
12	PC17	40	2	2	1	C/C	A/G		CMNJ13	37	2	2	1	C/T	A/G
13	PC18	44	1	2	1	C/T	A/G		CMNJ14	42	1	2	1	C/C	A/G
14	PC19	50	2	2	2	C/T	A/G		CMNJ15	50	2	2	2	C/C	A/G
15	PC22	40	2	1	1	T/T	A/G		CMNJ17	34	2	1	1	C/C	A/A
16	PC29	28	2	2	1	C/T	A/G		CMNJ18	38	2	2	1	C/C	A/G
17	PC57	42	2	2	1	C/T	A/G		CMNJ19	45	2	2	1	C/C	A/G
18	PC58	35	1	2	1	C/T	A/G		CMNJ20	45	2	2	2	C/T	A/G
19	PC59	43	2	2	1	T/T	G/G		CMNJ23	46	2	2	1	C/T	A/G
20	PC60	35	2	1	1	C/C	A/G		CMNJ24	66	2	2	1	C/T	A/G
21	PC61	39	1	2	1	C/T	A/G		CMNJ25	34	1	1	1	C/C	A/G
22	PC62	40	1	2	1	C/C	A/G		CMNJ26	44	1	2	1	C/T	A/G
23	PC63	36	1	1	1	C/T	A/G		CMNJ27	57	2	1	1	C/T	A/G
24	PC64	55	2	2	1	C/T	A/G		CMNJ28	45	2	2	1	C/C	G/G
25	PC65	43	1	2	1	C/C	A/G		CMNJ29	55	2	2	2	C/T	G/G
26	PC66	47	2	2	1	C/C	A/G		CMNJ30	60	1	2	1	C/C	A/G
27	PC67	36	1	2	1	C/C	A/G		CMNJ31	40	1	2	1	C/C	A/G
28	PC68	35	1	2	1	C/C	A/G		CMNJ32	55	1	2	2	C/C	A/G
29	PC69	50	2	2	1	C/C	A/G		CMNJ33	53	2	2	1	C/C	A/G
30	PC70	59	2	2	1	T/T	G/G		CMNJ34	46	2	2	2	C/C	A/G
31	PC71	35	2	2	1	C/T	A/G		CMNJ35	39	2	1	1	C/C	A/A
32	PC72	40	1	2	1	C/C	A/G		CMNJ36	41	2	2	2	C/T	A/G
33	PC73	57	2	2	2	C/T	A/G		CMNJ37	45	2	2	1	C/T	A/A
34	PC74	47	2	1	1	C/C	A/G		CMNJ38	67	2	2	1	C/C	A/G
35	PC75	40	1	2	1	C/T	A/G		CMNJ39	50	2	1	1	C/T	A/G
36	PC76	49	2	2	1	C/C	A/G		CMNJ41	42	2	2	1	C/C	A/G
37	PC77	37	1	2	1	C/C	A/G		CMNJ42	42	1	2	1	C/C	A/G
38	PC78	35	1	2	1	C/C	A/G		CMNJ44	40	1	2	1	C/C	A/G
39	PC79	37	1	2	2	T/T	A/G		CMNJ45	62	1	2	2	C/C	A/G
40	PC80	37	1	2	1	C/C	A/A		CMNJ46	50	2	2	1	C/C	A/G
41	PC81	38	2	2	1	C/C	A/A		CMNJ47	52	2	2	2	C/C	A/G
42	PC82	47	2	2	2	C/T	A/A		CMNJ48	45	2	2	1	C/C	A/G
43	PC83	35	1	2	1	C/T	A/A		CMNJ49	57	2	2	2	C/C	A/G
44	PC84	36	1	2	2	C/C	A/G		CMNJ50	62	2	2	2	T/T	A/G
45	PC85	70	2	2	2	C/C	A/G		CMNJ51	35	2	2	1	C/C	A/G
46	PC86	35	1	2	1	C/C	A/G		CMNJ52	35	2	2	1	C/C	G/G
47	PC87	43	2	1	1	C/C	A/G		CMNJ53	70	2	1	1	C/C	A/G
48	PC88	35	1	2	1	C/C	A/G		CMNJ54	40	1	2	1	C/T	A/G
49	PC89	38	2	2	1	T/T	G/G		CMNJ55	41	2	2	1	C/C	A/G
50	PC90	35	2	2	1	C/C	A/G		CMNJ58	40	1	2	1	C/C	G/G
51	PC91	53	2	2	1	C/C	A/G		CMNJ59	50	2	2	2	T/T	A/G
52	PC92	38	1	2	1	C/C	A/G		CMNJ60	41	2	2	1	C/C	G/G
53	PC93	35	2	2	1	C/C	A/G		CMNJ61	45	2	2	1	C/T	A/G
54	PC94	35	1	2	1	C/T	A/G		CMNJ62	40	2	2	1	C/T	A/G
55	PC95	36	2	2	1	C/C	A/G		CMNJ63	43	2	2	1	C/T	A/G
56	PC96	43	1	2	1	C/T	A/G		CMNJ65	38	2	2	1	C/C	A/G
57	PC98	36	2	2	2	C/C	A/G		CMNJ66	52	1	2	2	C/T	A/G
58	PC98	38	2	2	1	C/C	A/G		CMNJ68	39	2	2	1	C/T	A/G
59	PC99	40	2	2	1	C/T	A/G		CMNJ69	42	2	2	1	C/T	A/G
60	PC100	46	2	2	1	T/T	G/G		CMNJ70	49	2	2	2	C/C	G/G
61	PC101	40	1	2	1	C/C	A/G		CMNJ71	53	2	2	2	C/T	A/G
62	PC102	45	2	2	1	C/C	A/G		CMNJ72	30	2	2	1	C/C	A/G
63	PC103	40	2	2	1	C/T	A/G		CMNJ74	35	1	2	1	C/C	G/G
64	PC104	47	1	2	1	C/C	A/G		CMNJ75	40	2	2	1	T/T	A/G
65	PC105	48	2	2	1	C/C	A/G		CMNJ76	62	2	2	2	C/T	G/G
66	PC106	36	2	2	1	C/C	A/G		CMNJ77	38	2	2	1	C/C	G/G
67	PC107	40	1	2	1	C/C	A/G		CMNJ 78	41	1	2	1	C/C	G/G
68	PC108	49	1	2	1	C/C	A/G		CMNJ79	38	2	2	1	C/C	A/G
69	PC109	40	2	2	1	C/C	A/G		CMNJ80	62	2	2	2	C/C	A/G
70	PC110	40	1	2	1	C/T	A/G		CMNJ81	54	2	2	1	C/C	A/G
71	PC113	36	2	2	2	T/T	G/G		CMNJ82	50	2	1	2	C/C	A/G
72	PC114	37	1	2	1	C/C	A/G		CMNJ83	46	2	2	1	T/T	A/G
73	PC115	39	2	2	1	C/T	A/G		CMNJ84	43	2	2	1	C/C	A/G
74	PC116	52	2	2	1	C/C	A/G		CMNJ85	47	2	2	1	C/T	A/G
75	PC117	30	2	2	1	C/C	A/G		CMNJ86	75	2	2	1	C/T	G/G
76	PC118	51	1	2	1	C/T	A/G		CMNJ87	32	2	2	1	C/C	A/G
77	PC119	30	2	2	1	C/C	A/G		CMNJ88	53	2	1	1	C/C	G/G
78	PC120	34	2	1	1	C/T	A/G		CMNJ89	30	2	1	1	C/C	G/G
79	PC121	32	1	2	1	C/C	A/G		CMNJ90	35	2	2	1	C/C	A/G
80	PC122	55	2	2	1	C/C	A/G		CMNJ91	40	2	2	1	C/T	A/G
81	PC123	36	1	2	1	C/T	A/G		CMNJ92	35	2	2	1	C/C	A/G
82	PC124	30	2	1	1	C/C	A/A		CMNJ93	68	2	1	2	C/C	A/G
83	PC125	32	2	2	1	C/C	A/A		CMNJ95	41	2	2	1	C/C	A/G
84	PC126	53	1	2	1	T/T	G/G		CMNJ96	35	2	2	1	C/T	A/G
85	PC166	53	2	2	1	C/C	A/A		CMNJ97	41	2	1	2	C/C	A/G
86	PC127	42	1	2	1	C/T	A/A		CMNJ98	35	2	2	1	C/C	A/G
87	PC128	40	2	2	1	C/C	A/G		CMNJ99	40	2	2	1	C/T	A/G
88	PC129	35	1	2	1	C/T	A/G		CMNJ100	40	1	2	1	T/T	G/G
89	PC130	40	1	2	1	C/T	A/G		MGH	40	1	2	1	C/C	A/G
90	PC131	36	1	2	1	C/C	A/G		CMNJ101	40	2	2	1	C/T	A/G
91	PC132	53	2	2	1	C/C	A/G		CMNJ102	40	2	2	1	C/T	A/G
92	PC133	40	1	2	1	C/T	A/G		CMNJ104	40	2	2	1	C/C	A/G
93	PC134	41	2	2	1	C/C	A/G		CMNJ105	26	2	2	1	T/T	G/G
94	PC135	50	2	2	1	C/C	A/G		CMNJ106	40	2	2	1	C/C	A/G
95	PC136	45	1	2	1	T/T	A/G		CMNJ107	37	2	2	1	C/C	A/G
96	PC137	42	2	2	1	C/C	A/G		CMNJ108	40	2	2	1	T/T	A/G
97	PC138	55	2	2	1	C/T	G/G		CMNJ109	40	2	2	1	C/T	A/G
98	PC139	34	1	2	1	C/C	A/G		CMNJ110	62	2	1	2	T/T	A/G
99	PC140	50	2	2	1	C/T	G/G		CMNJ111	35	2	2	1	C/T	A/G
100	PC141	32	2	2	1	C/T	G/G		CMNJ113	45	2	2	2	C/T	A/G
101	PC142	51	1	2	1	C/C	A/A		CMNJ114	35	1	1	1	C/T	G/G
102	PC143	50	1	2	1	T/T	A/G		CMNJ117	26	2	2	1	C/T	A/G
103	PC144	47	1	2	1	C/C	A/A		CMNJ118	42	1	2	1	C/C	A/G
104	PC145	32	2	2	1	C/T	G/G		CMNJ120	43	2	2	1	C/C	A/G
105	PC146	49	2	2	1	T/T	A/G		CMNJ121	35	2	2	1	C/T	A/G
106	PC147	46	2	2	1	C/C	A/G		CMNJ122	40	2	2	1	C/C	A/A
107	PC148	37	1	2	2	C/T	G/G		CMNJ123	68	1	2	2	C/C	A/G
108	PC149	36	1	2	1	C/C	A/A		CMNJ124	38	2	2	1	C/T	A/A
109	PC149	57	2	2	1	C/T	G/G		CMNJ125	48	2	2	2	C/T	A/A
110	PC151	49	2	2	1	C/C	A/A		CMNJ126	39	2	1	1	T/T	G/G
111	PC152	50	1	2	1	C/C	A/G		CMNJ127	40	2	2	1	C/T	G/G
112	PC153	48	2	2	1	C/C	A/G		CMNJ238	47	2	1	1	C/C	A/A
113	PC154	38	1	2	1	C/T	A/A		CMNJ 128	60	1	2	2	T/T	G/G
114	PC155	52	2	2	2	C/C	A/A		CMNJ129	54	2	2	2	C/T	A/G
115	PC156	53	2	2	1	C/T	G/G		CMNJ133	69	2	2	2	C/T	A/A
116	PC157	51	1	2	1	C/C	A/A		CMNJ134	44	2	2	1	C/C	A/A
117	PC158	38	2	2	1	C/C	A/G		CMNJ136	45	2	1	2	C/T	A/G
118	PC159	44	2	2	1	C/C	A/G		CMNJ137	40	2	1	1	C/C	A/A
119	PC160	43	1	2	1	C/C	A/G		CMNJ141	50	1	2	1	C/C	A/A
120	PC161	58	1	2	1	C/C	A/G		CMNJ143	36	2	2	1	C/T	A/G
121	PC162	42	2	2	1	C/C	A/G		CMNJ144	36	2	1	1	C/C	G/G
122	PC163	49	2	2	1	C/C	A/G		CMNJ145	40	2	2	1	C/T	A/G
123	PC164	57	2	2	1	T/T	G/G		CMNJ146	32	2	1	1	T/T	G/G
124	PC165	38	1	2	1	C/C	A/G		CMNJ147	30	2	2	1	C/T	A/A
125	PC178	47	2	1	1	C/T	A/G		CMNJ148	65	2	1	1	C/C	A/A
126	PC179	39	1	2	1	C/C	A/G		CMNJ149	36	2	2	1	C/C	A/G
127	PC180	38	1	2	1	C/T	A/G		CMNJ150	32	2	1	1	C/C	A/G
128	PC181	52	2	2	2	C/C	A/G		CMNJ152	48	2	2	2	C/T	A/G
129	PC182	31	2	2	1	C/C	A/G		CMNJ153	40	2	2	1	C/C	A/A
130	PC183	45	2	2	1	C/C	A/G		CMNJ154	46	2	2	1	C/C	A/A
131	PC184	43	2	2	1	C/T	A/G		CMNJ156	55	2	2	2	C/C	A/A
132	PC185	43	1	2	1	C/C	A/G		CMNJ160	45	2	2	2	C/C	A/G
133	PC186	43	2	2	1	C/C	A/A		CMNJ167	65	2	2	2	C/C	A/G
134	PC187	50	2	2	1	C/T	A/G		CMNJ168	56	2	2	1	C/C	A/G
135	PC188	45	2	2	1	C/C	A/A		CMNJ169	65	2	2	2	C/C	A/G
136	PC189	45	1	2	1	C/C	A/A		CMNJ170	56	1	2	1	C/C	A/A
137	PC190	40	2	2	1	C/C	A/G		CMNJ171	40	2	2	1	C/C	G/G
138	PC191	47	2	2	1	C/C	A/G		CMNJ172	40	2	2	1	C/C	A/A
139	PC192	39	1	2	1	C/C	A/G		CMNJ173	44	2	2	1	C/C	A/A
140	PC193	49	2	2	1	C/C	A/G		CMNJ174	36	2	2	1	C/C	A/A
141	PC194	58	2	2	1	T/T	G/G		CMNJ175	40	2	2	1	C/C	A/A
142	PC195	50	2	1	2	C/C	A/G		CMNJ176	60	2	1	2	C/T	A/G
143	PC196	43	2	2	1	C/T	A/G		CMNJ177	30	2	2	1	C/T	A/G
144	PC197	45	2	2	1	C/C	A/G		CMNJ178	40	2	2	1	C/T	A/G
145	PC198	45	2	1	1	C/C	A/G		CMNJ179	32	2	1	1	T/T	A/G
146	PC199	45	2	2	1	C/T	A/G		CMNJ180	40	2	2	1	C/C	A/G
147	PC200	45	1	2	1	C/C	A/G		CMNJ181	45	2	2	2	C/C	A/G
148	PC201	47	2	2	1	C/T	A/G		CMNJ182	46	2	1	1	C/C	A/A
149	PC202	50	2	2	2	C/T	G/G		CMNJ183	60	2	2	2	C/C	A/A
150	PC203	39	1	1	1	C/T	G/G		CMNJ184	48	1	1	1	C/T	A/G
151	PC204	42	2	2	1	T/T	A/G		CMNJ185	44	2	2	1	C/T	A/G
152	PC205	45	2	2	1	C/C	A/G		CMNJ186	42	2	2	1	C/C	A/A
153	PC206	40	2	2	1	C/C	A/G		CMNJ187	20	2	2	1	C/C	A/A
154	PC207	57	2	2	1	C/T	G/G		CMNJ188	45	2	2	1	C/C	A/A
155	PC208	62	2	2	1	C/C	A/G		CMNJ190	40	2	2	1	C/C	A/A
156	PC209	34	1	2	1	C/T	G/G		CMNJ191	62	2	2	2	C/C	A/A
157	PC210	49	2	2	1	C/C	A/G		CMNJ192	40	2	1	1	C/C	A/G
158	PC211	33	1	2	1	C/C	A/G		CMNJ193	36	2	2	1	C/C	A/G
159	PC212	44	2	2	1	C/T	A/G		CMNJ194	52	2	2	2	C/C	A/G
160	PC213	38	2	1	1	C/C	A/G		CMNJ195	45	2	1	1	T/T	G/G
161	PC214	31	1	2	1	C/C	A/A		CMNJ196	40	2	2	1	C/C	A/G
162	PC215	52	2	2	1	C/T	A/G		CMNJ197	26	2	1	1	C/C	A/A
163	PC216	41	2	2	1	C/C	A/A		CMNJ198	47	2	2	2	C/C	A/A
164	PC217	36	2	2	2	C/T	A/G		CMNJ199	55	2	2	2	C/C	A/A
165	PC218	38	1	2	1	C/C	A/A		CMNJ200	45	1	2	2	C/C	G/G
166	PC219	49	1	2	1	C/C	A/G		CMNJ201	28	1	1	1	C/C	A/A
167	PC220	41	2	2	1	C/C	A/G		CMNJ202	48	2	2	2	C/C	A/A
168	PC221	45	2	1	1	C/T	A/A		CMNJ203	50	2	1	1	C/C	A/G
169	PC222	31	1	2	1	C/C	A/A		CMNJ204	50	2	2	2	C/C	A/G
170	PC223	32	2	2	1	C/C	A/A		CMNJ205	40	2	2	1	C/C	A/G
171	PC224	44	1	2	1	C/C	A/A		CMNJ206	40	1	1	1	C/C	A/A
172	PC225	50	2	2	1	C/T	A/G		CMNJ207	45	2	2	2	C/C	A/G
173	PC227	38	1	2	1	C/C	A/A		CMNJ208	42	2	2	1	C/C	A/G
174	PC226	43	2	2	1	C/C	A/A		CMNJ209	37	2	2	1	C/T	A/G
175	PC227	54	2	2	1	C/C	A/A		CMNJ210	55	2	1	1	C/T	A/G
176	PC228	60	2	2	1	C/T	A/G		CMNJ211	43	2	2	1	C/C	A/G
177	PC229	55	2	2	1	C/C	A/A		CMNJ215	36	2	2	1	C/C	A/A
178	PC230	57	2	2	1	C/T	A/G		CMNJ218	38	2	2	1	C/C	A/A
179	PC231	46	2	2	1	C/C	A/A		CMNJ221	48	2	1	1	C/C	A/G
180	PC232	42	2	2	1	C/C	A/A		CMNJ220	29	2	2	1	C/C	A/G
181	PC233	56	2	2	1	C/T	A/A		CMNJ222	47	2	2	1	C/C	A/G
182	PC234	53	2	2	2	C/C	A/A		CMNJ225	47	2	2	2	C/C	A/G
183	PC235	58	2	2	1	T/T	A/G		CMNJ227	42	2	2	1	C/C	A/G
184	PC236	44	2	1	1	C/T	A/A		CMNJ228	69	2	1	2	C/C	A/G
185	PC237	51	2	2	1	C/C	A/A		CMNJ229	36	2	2	1	C/C	A/G
186	PC238	50	2	2	1	C/C	A/G		CMNJ230	40	2	2	1	C/C	A/G
187	PC239	53	2	1	1	C/C	A/G		CMNJ231	65	2	1	2	C/C	A/G
188	PC240	57	2	2	1	C/C	A/A		CMNJ232	45	2	2	1	C/C	A/G
189	PC241	44	2	2	1	C/C	A/A		CMNJ234	44	2	2	1	C/C	A/G
190	PC242	49	2	2	2	C/C	A/A		CMNJ235	48	2	1	2	C/C	A/A
191	PC243	41	1	2	1	C/C	A/A		CMNJ236	40	1	2	1	C/C	A/A
192	PC244	58	2	1	1	C/C	A/A		CMNJ237	45	2	1	1	C/C	A/G
193	PC245	62	2	2	1	C/T	A/A		CMNJ239	40	2	2	2	T/T	G/G
194	PC246	63	2	2	1	C/C	A/A		CMNJ240	40	2	2	1	C/C	A/G
195	PC247	59	1	2	1	C/T	A/A		NBC1	70	1	2	2	C/C	A/G
196	PC248	57	2	2	1	C/C	A/G		NBC2	54	2	2	1	C/C	A/A
197	PC249	55	2	2	2	C/C	A/G		NBC3	60	2	2	2	C/T	A/G
198	PC250	54	1	2	1	C/T	A/G		NBC4	46	1	2	1	C/T	A/G
199	PC251	52	2	2	1	C/T	A/G		NBC5	37	2	2	1	C/C	A/G
200	PC252	54	1	2	1	C/C	A/G		NBC6	45	1	2	1	C/T	A/G
201	PC253	52	1	1	1	C/T	A/G		NBC7	46	1	1	2	C/T	A/G
202	PC254	54	1	2	1	C/C	A/G		NBC8	56	1	2	2	C/C	A/A
203	PC255	51	2	1	2	C/C	A/A		NBC9	60	2	1	2	C/T	A/G
204	PC256	53	2	2	1	C/T	A/G		NBC10	62	2	2	2	T/T	G/G
205	PC257	55	2	2	2	C/T	A/G		NBC11	47	2	2	2	C/C	A/A
206	PC258	48	2	2	1	C/C	A/A		NBC12	45	2	2	1	C/C	A/G
207	PC259	47	2	2	1	T/T	G/G		NBC13	57	2	2	2	T/T	A/G
208	PC260	54	1	2	1	C/C	A/A		NBC14	47	1	2	1	C/T	A/G
209	PC261	57	2	2	1	C/C	A/A		NBC15	58	2	2	2	C/C	A/G
210	PC262	59	2	2	1	C/C	A/G		NBC16	46	2	2	1	C/C	A/G
211	PC263	56	2	2	1	C/C	A/A		NBC18	58	2	2	2	T/T	A/G
212	PC264	49	2	2	2	C/C	A/A		NBC19	85	2	2	2	C/C	A/G
213	PC265	47	2	2	1	C/T	A/A		NBC20	56	2	2	2	C/C	A/G
214	PC266	43	2	2	1	C/C	A/G		NBC21	49	2	2	2	C/C	A/G
215	PC267	56	2	2	2	C/C	A/G		NBC22	54	2	2	2	C/T	A/G
216	PC268	49	2	2	1	C/C	A/G		NBC23	45	2	2	2	T/T	A/G
217	PC269	46	2	2	1	C/T	A/A		NBC24	45	2	2	1	C/C	A/G
218	PC270	52	2	2	1	C/C	A/G		NBC25	80	2	2	2	C/C	A/G
219	PC271	51	2	2	1	C/C	A/G		NBC26	47	2	2	1	C/T	A/G
220	PC272	47	2	2	1	C/C	A/G		NBC27	45	2	2	1	T/T	A/G
221	PC273	52	2	2	2	C/C	A/G		NBC28	65	2	2	2	C/T	A/G
222	PC274	49	1	2	1	C/C	A/G		NBC30	58	1	2	2	C/C	A/A
223	PC275	41	2	2	2	C/C	A/G		NBC31	48	2	2	2	C/C	A/A
224	PC276	46	1	2	1	C/C	A/A		NBC32	48	1	2	2	T/T	G/G
225	PC277	41	2	2	1	C/C	A/A		NBC33	50	2	1	1	C/T	A/G
226	PC278	58	2	2	1	C/C	A/A		NBC34	55	2	2	2	C/C	A/G
227	PC279	58	2	1	1	C/C	A/A		NBC35	52	2	1	1	C/C	A/G
228	PC280	56	2	2	1	C/T	A/A		NBC36	45	2	2	1	T/T	A/G
229	PC281	41	1	2	1	C/T	A/A		NBC37	80	2	2	2	C/C	A/G
230	PC282	47	2	2	1	C/C	A/G		NBC38	56	2	2	2	C/T	A/G
231	PC283	64	2	2	2	C/T	A/G		NBC39	55	2	2	2	C/C	A/G
232	PC284	55	1	2	1	C/T	A/G		NBC40	48	1	2	2	C/C	A/G
233	PC285	53	2	2	1	C/C	A/G		NBC42	50	2	2	1	T/T	A/G
234	PC286	54	2	2	1	T/T	A/G		NBC46	32	2	1	1	C/C	A/A
235	PC287	50	2	2	1	C/C	A/G		NBC47	37	2	1	1	C/T	A/G
236	PC288	51	2	2	2	C/C	A/G		NBC48	53	2	2	2	C/T	A/G
237	PC289	49	2	2	1	C/C	A/G		NBC49	74	2	2	2	C/T	A/G
238	PC290	41	1	2	1	C/C	A/G		NBC52	48	2	2	1	C/C	A/A
239	PC291	43	2	1	1	C/C	A/G		NBC53	60	2	1	2	C/T	A/G
240	PC292	46	2	2	2	C/C	A/G		NBC54	70	2	2	2	C/T	A/G
241	PC293	47	1	1	2	C/C	A/G		NBC56	55	1	1	2	C/C	A/A
242	PC294	44	1	2	1	C/C	A/G		NBC57	48	2	2	1	C/C	A/A
243	PC295	50	2	2	1	C/C	A/A		NBC58	45	2	2	1	C/T	A/G
244	PC296	46	2	1	2	C/C	A/A		NBC60	58	2	1	2	T/T	A/G
245	PC297	48	2	2	2	C/T	A/G		NBC61	60	2	2	2	C/T	G/G
246	PC298	58	2	2	2	C/C	A/A		NBC62	66	2	2	2	C/C	A/A
247	PC299	58	2	2	1	C/C	A/A		NBC63	44	2	2	1	C/T	A/G
248	PC300	56	2	2	2	C/T	A/G		NBC64	60	2	2	2	C/C	A/A
249	PC301	41	1	2	1	C/C	A/A		NBC65	50	2	2	2	C/T	A/G
250	PC302	47	2	1	2	C/C	A/A		NBC66	65	2	1	2	C/C	A/G
251	PC303	64	2	2	2	C/T	A/G		NBC69	49	2	2	2	C/T	A/G
252	PC304	55	2	2	2	C/C	A/A		NBC72	65	2	2	2	C/C	A/A
253	PC305	53	2	2	2	C/C	A/G		NBC74	45	2	2	2	C/C	A/A
254	PC306	54	2	2	1	C/C	A/G		NBC76	44	2	2	1	C/T	A/G
255	PC307	50	2	2	1	C/C	A/G		NBC77	56	2	2	1	T/T	A/G
256	PC308	51	2	2	1	C/C	A/G		NBC78	44	2	2	1	C/C	A/G
257	PC309	49	1	2	1	C/C	A/G		NBC79	40	1	2	1	C/T	A/A
258	PC310	51	2	2	2	C/C	A/G		NBC80	50	2	2	2	C/C	A/A
259	PC311	53	2	2	2	C/T	A/G		NBC81	51	2	2	2	C/T	A/G
260	PC312	46	2	2	2	C/C	A/G		NBC82	45	2	2	2	C/C	A/A
261	PC313	47	1	1	1	C/C	A/G		NBC83	55	2	1	2	C/T	A/G
262	PC314	44	2	2	1	C/C	A/G		NBC84	48	2	2	1	T/T	A/G
263	PC315	50	2	2	2	C/C	A/G		NBC85	70	2	2	2	C/C	A/G
264	PC316	46	2	2	2	C/C	A/G		NBC86	45	2	2	2	C/C	A/A
265	PC317	58	2	2	1	C/C	A/G		NBC87	45	2	1	1	C/T	A/G
266	PC318	58	2	2	2	C/C	A/G		NBC88	68	2	2	2	C/T	A/A
267	PC319	56	2	2	2	C/C	A/G		NBC89	63	2	2	2	C/C	A/A
268	PC320	55	2	2	1	C/C	A/G		NBC90	24	2	2	1	C/C	G/G
269	PC321	47	2	2	1	C/T	A/A		NBC91	52	2	1	2	C/T	A/G
270	PC322	64	1	2	1	C/C	A/G		NBC92	55	1	2	1	C/T	A/G
271	PC323	55	2	2	1	C/C	A/G		NBC93	53	2	2	1	C/C	A/G
272	PC324	53	2	2	2	C/C	A/G		NBC94	57	2	2	2	C/T	A/G
273	PC325	54	2	2	2	C/T	A/A		NBC95	48	2	2	2	C/C	A/G
274	PC326	50	2	2	1	C/C	A/A		NBC96	60	2	2	2	T/T	A/G
275	PC327	51	2	2	2	C/C	A/A		NBC97	63	2	2	2	C/T	A/G
276	PC328	49	2	2	2	T/T	A/G		NBC98	60	2	2	2	C/T	G/G
277	PC329	41	2	2	2	C/C	A/A		NBC99	60	2	2	2	C/C	A/G
278	PC330	55	2	2	2	C/C	A/A		NBC100	50	2	2	2	C/C	A/G
279	PC331	46	2	2	2	C/T	A/A		NBC101	60	2	2	2	C/T	A/G
280	PC332	59	2	2	1	C/T	A/A		NBC102	45	2	2	1	C/C	A/G
281	PC333	44	2	2	2	C/C	A/A		NBC103	63	2	2	2	C/T	A/G
282	PC334	50	1	2	2	C/T	A/G		NBC104	60	2	2	2	C/C	A/G
283	PC335	46	2	2	1	C/C	A/G		NBC105	58	2	2	2	C/T	A/G
284	PC336	55	2	2	1	C/T	A/G		NBC106	42	2	2	1	C/T	A/G
285	PC337	53	2	2	2	C/C	A/G		NBC107	74	2	1	2	T/T	A/G
286	PC338	57	2	2	1	C/C	A/G		NBC108	32	2	2	1	C/C	A/G
287	PC339	50	2	2	1	C/C	A/A		NBC109	56	2	2	1	C/C	A/G
288	PC340	49	2	2	1	C/T	A/G		NBC110	42	2	2	1	C/T	A/G
289	PC341	47	2	2	1	C/C	A/A		NBC111	50	2	2	1	C/C	A/G
290	PC342	54	2	2	2	C/C	A/A		NBC112	57	2	2	2	C/C	A/A
291	PC343	51	2	2	1	C/T	A/G		NBC113	52	2	2	1	C/T	G/G
292	PC344	52	2	2	2	C/C	A/A		NBC114	64	2	2	2	C/T	A/G
293	PC345	46	2	1	1	T/T	G/G		NBC115	48	2	1	2	C/C	A/G
294	PC346	51	2	2	1	C/C	A/A		NBC116	60	2	2	2	C/C	A/G
295	PC347	52	2	2	2	C/C	A/A		NBC117	60	2	2	2	C/T	G/G
296	PC348	47	1	2	1	C/C	A/A		NBC118	50	1	2	2	C/C	A/G
297	PC349	48	2	2	1	C/C	A/A		NBC119	48	2	2	2	T/T	G/G
298	PC350	44	2	1	2	C/T	A/G		NBC120	49	2	1	2	C/T	A/G
299	PC351	49	2	2	1	C/C	A/A		NBC122	48	2	2	1	C/T	A/G
300	PC352	52	2	2	2	C/T	A/G		NBC123	58	2	2	2	C/C	A/G

## Sheet: LD
1	1	0	0	0	0	2 2	1 1					1	1	0	0	0	1	2 4	1 1
2	2	0	0	0	0	2 2	1 1					2	2	0	0	0	1	2 4	1 3
3	3	0	0	0	0	4 4	3 3					3	3	0	0	0	1	2 2	1 1
4	4	0	0	0	0	2 4	1 3					4	4	0	0	0	1	4 4	3 3
5	5	0	0	0	0	4 4	3 3					5	5	0	0	0	1	2 2	3 3
6	6	0	0	0	0	2 2	1 1					6	6	0	0	0	1	2 4	3 3
7	7	0	0	0	0	2 2	1 3					7	7	0	0	0	1	2 4	1 3
8	8	0	0	0	0	2 2	1 3					8	8	0	0	0	1	2 4	1 3
9	9	0	0	0	0	2 2	1 3					9	9	0	0	0	1	2 4	1 1
10	10	0	0	0	0	2 2	1 3					10	10	0	0	0	1	2 4	1 3
11	11	0	0	0	0	2 2	1 3					11	11	0	0	0	1	2 4	1 1
12	12	0	0	0	0	2 2	1 3					12	12	0	0	0	1	2 4	1 3
13	13	0	0	0	0	2 4	1 3					13	13	0	0	0	1	2 2	1 3
14	14	0	0	0	0	2 4	1 3					14	14	0	0	0	1	2 2	1 3
15	15	0	0	0	0	4 4	1 3					15	15	0	0	0	1	2 2	1 1
16	16	0	0	0	0	2 4	1 3					16	16	0	0	0	1	2 2	1 3
17	17	0	0	0	0	2 4	1 3					17	17	0	0	0	1	2 2	1 3
18	18	0	0	0	0	2 4	1 3					18	18	0	0	0	1	2 4	1 3
19	19	0	0	0	0	4 4	3 3					19	19	0	0	0	1	2 4	1 3
20	20	0	0	0	0	2 2	1 3					20	20	0	0	0	1	2 4	1 3
21	21	0	0	0	0	2 4	1 3					21	21	0	0	0	1	2 2	1 3
22	22	0	0	0	0	2 2	1 3					22	22	0	0	0	1	2 4	1 3
23	23	0	0	0	0	2 4	1 3					23	23	0	0	0	1	2 4	1 3
24	24	0	0	0	0	2 4	1 3					24	24	0	0	0	1	2 2	3 3
25	25	0	0	0	0	2 2	1 3					25	25	0	0	0	1	2 4	3 3
26	26	0	0	0	0	2 2	1 3					26	26	0	0	0	1	2 2	1 3
27	27	0	0	0	0	2 2	1 3					27	27	0	0	0	1	2 2	1 3
28	28	0	0	0	0	2 2	1 3					28	28	0	0	0	1	2 2	1 3
29	29	0	0	0	0	2 2	1 3					29	29	0	0	0	1	2 2	1 3
30	30	0	0	0	0	4 4	3 3					30	30	0	0	0	1	2 2	1 3
31	31	0	0	0	0	2 4	1 3					31	31	0	0	0	1	2 2	1 1
32	32	0	0	0	0	2 2	1 3					32	32	0	0	0	1	2 4	1 3
33	33	0	0	0	0	2 4	1 3					33	33	0	0	0	1	2 4	1 1
34	34	0	0	0	0	2 2	1 3					34	34	0	0	0	1	2 2	1 3
35	35	0	0	0	0	2 4	1 3					35	35	0	0	0	1	2 4	1 3
36	36	0	0	0	0	2 2	1 3					36	36	0	0	0	1	2 2	1 3
37	37	0	0	0	0	2 2	1 3					37	37	0	0	0	1	2 2	1 3
38	38	0	0	0	0	2 2	1 3					38	38	0	0	0	1	2 2	1 3
39	39	0	0	0	0	4 4	1 3					39	39	0	0	0	1	2 2	1 3
40	40	0	0	0	0	2 2	1 1					40	40	0	0	0	1	2 2	1 3
41	41	0	0	0	0	2 2	1 1					41	41	0	0	0	1	2 2	1 3
42	42	0	0	0	0	2 4	1 1					42	42	0	0	0	1	2 2	1 3
43	43	0	0	0	0	2 4	1 1					43	43	0	0	0	1	2 2	1 3
44	44	0	0	0	0	2 2	1 3					44	44	0	0	0	1	4 4	1 3
45	45	0	0	0	0	2 2	1 3					45	45	0	0	0	1	2 2	1 3
46	46	0	0	0	0	2 2	1 3					46	46	0	0	0	1	2 2	3 3
47	47	0	0	0	0	2 2	1 3					47	47	0	0	0	1	2 2	1 3
48	48	0	0	0	0	2 2	1 3					48	48	0	0	0	1	2 4	1 3
49	49	0	0	0	0	4 4	3 3					49	49	0	0	0	1	2 2	1 3
50	50	0	0	0	0	2 2	1 3					50	50	0	0	0	1	2 2	3 3
51	51	0	0	0	0	2 2	1 3					51	51	0	0	0	1	4 4	1 3
52	52	0	0	0	0	2 2	1 3					52	52	0	0	0	1	2 2	3 3
53	53	0	0	0	0	2 2	1 3					53	53	0	0	0	1	2 4	1 3
54	54	0	0	0	0	2 4	1 3					54	54	0	0	0	1	2 4	1 3
55	55	0	0	0	0	2 2	1 3					55	55	0	0	0	1	2 4	1 3
56	56	0	0	0	0	2 4	1 3					56	56	0	0	0	1	2 2	1 3
57	57	0	0	0	0	2 2	1 3					57	57	0	0	0	1	2 4	1 3
58	58	0	0	0	0	2 2	1 3					58	58	0	0	0	1	2 4	1 3
59	59	0	0	0	0	2 4	1 3					59	59	0	0	0	1	2 4	1 3
60	60	0	0	0	0	4 4	3 3					60	60	0	0	0	1	2 2	3 3
61	61	0	0	0	0	2 2	1 3					61	61	0	0	0	1	2 4	1 3
62	62	0	0	0	0	2 2	1 3					62	62	0	0	0	1	2 2	1 3
63	63	0	0	0	0	2 4	1 3					63	63	0	0	0	1	2 2	3 3
64	64	0	0	0	0	2 2	1 3					64	64	0	0	0	1	4 4	1 3
65	65	0	0	0	0	2 2	1 3					65	65	0	0	0	1	2 4	3 3
66	66	0	0	0	0	2 2	1 3					66	66	0	0	0	1	2 2	3 3
67	67	0	0	0	0	2 2	1 3					67	67	0	0	0	1	2 2	3 3
68	68	0	0	0	0	2 2	1 3					68	68	0	0	0	1	2 2	1 3
69	69	0	0	0	0	2 2	1 3					69	69	0	0	0	1	2 2	1 3
70	70	0	0	0	0	2 4	1 3					70	70	0	0	0	1	2 2	1 3
71	71	0	0	0	0	4 4	3 3					71	71	0	0	0	1	2 2	1 3
72	72	0	0	0	0	2 2	1 3					72	72	0	0	0	1	4 4	1 3
73	73	0	0	0	0	2 4	1 3					73	73	0	0	0	1	2 2	1 3
74	74	0	0	0	0	2 2	1 3					74	74	0	0	0	1	2 4	1 3
75	75	0	0	0	0	2 2	1 3					75	75	0	0	0	1	2 4	3 3
76	76	0	0	0	0	2 4	1 3					76	76	0	0	0	1	2 2	1 3
77	77	0	0	0	0	2 2	1 3					77	77	0	0	0	1	2 2	3 3
78	78	0	0	0	0	2 4	1 3					78	78	0	0	0	1	2 2	3 3
79	79	0	0	0	0	2 2	1 3					79	79	0	0	0	1	2 2	1 3
80	80	0	0	0	0	2 2	1 3					80	80	0	0	0	1	2 4	1 3
81	81	0	0	0	0	2 4	1 3					81	81	0	0	0	1	2 2	1 3
82	82	0	0	0	0	2 2	1 1					82	82	0	0	0	1	2 2	1 3
83	83	0	0	0	0	2 2	1 1					83	83	0	0	0	1	2 2	1 3
84	84	0	0	0	0	4 4	3 3					84	84	0	0	0	1	2 4	1 3
85	85	0	0	0	0	2 2	1 1					85	85	0	0	0	1	2 2	1 3
86	86	0	0	0	0	2 4	1 1					86	86	0	0	0	1	2 2	1 3
87	87	0	0	0	0	2 2	1 3					87	87	0	0	0	1	2 4	1 3
88	88	0	0	0	0	2 4	1 3					88	88	0	0	0	1	4 4	3 3
89	89	0	0	0	0	2 4	1 3					89	89	0	0	0	1	2 2	1 3
90	90	0	0	0	0	2 2	1 3					90	90	0	0	0	1	2 4	1 3
91	91	0	0	0	0	2 2	1 3					91	91	0	0	0	1	2 4	1 3
92	92	0	0	0	0	2 4	1 3					92	92	0	0	0	1	2 2	1 3
93	93	0	0	0	0	2 2	1 3					93	93	0	0	0	1	4 4	3 3
94	94	0	0	0	0	2 2	1 3					94	94	0	0	0	1	2 2	1 3
95	95	0	0	0	0	4 4	1 3					95	95	0	0	0	1	2 2	1 3
96	96	0	0	0	0	2 2	1 3					96	96	0	0	0	1	4 4	1 3
97	97	0	0	0	0	2 4	3 3					97	97	0	0	0	1	2 4	1 3
98	98	0	0	0	0	2 2	1 3					98	98	0	0	0	1	4 4	1 3
99	99	0	0	0	0	2 4	3 3					99	99	0	0	0	1	2 4	1 3
100	100	0	0	0	0	2 4	3 3					100	100	0	0	0	1	2 4	1 3
101	101	0	0	0	0	2 2	1 1					101	101	0	0	0	1	2 4	3 3
102	102	0	0	0	0	4 4	1 3					102	102	0	0	0	1	2 4	1 3
103	103	0	0	0	0	2 2	1 1					103	103	0	0	0	1	2 2	1 3
104	104	0	0	0	0	2 4	3 3					104	104	0	0	0	1	2 2	1 3
105	105	0	0	0	0	4 4	1 3					105	105	0	0	0	1	2 4	1 3
106	106	0	0	0	0	2 2	1 3					106	106	0	0	0	1	2 2	1 1
107	107	0	0	0	0	2 4	3 3					107	107	0	0	0	1	2 2	1 3
108	108	0	0	0	0	2 2	1 1					108	108	0	0	0	1	2 4	1 1
109	109	0	0	0	0	2 4	3 3					109	109	0	0	0	1	2 4	1 1
110	110	0	0	0	0	2 2	1 1					110	110	0	0	0	1	4 4	3 3
111	111	0	0	0	0	2 2	1 3					111	111	0	0	0	1	2 4	3 3
112	112	0	0	0	0	2 2	1 3					112	112	0	0	0	1	2 2	1 1
113	113	0	0	0	0	2 4	1 1					113	113	0	0	0	1	4 4	3 3
114	114	0	0	0	0	2 2	1 1					114	114	0	0	0	1	2 4	1 3
115	115	0	0	0	0	2 4	3 3					115	115	0	0	0	1	2 4	1 1
116	116	0	0	0	0	2 2	1 1					116	116	0	0	0	1	2 2	1 1
117	117	0	0	0	0	2 2	1 3					117	117	0	0	0	1	2 4	1 3
118	118	0	0	0	0	2 2	1 3					118	118	0	0	0	1	2 2	1 1
119	119	0	0	0	0	2 2	1 3					119	119	0	0	0	1	2 2	1 1
120	120	0	0	0	0	2 2	1 3					120	120	0	0	0	1	2 4	1 3
121	121	0	0	0	0	2 2	1 3					121	121	0	0	0	1	2 2	3 3
122	122	0	0	0	0	2 2	1 3					122	122	0	0	0	1	2 4	1 3
123	123	0	0	0	0	4 4	3 3					123	123	0	0	0	1	4 4	3 3
124	124	0	0	0	0	2 2	1 3					124	124	0	0	0	1	2 4	1 1
125	125	0	0	0	0	2 4	1 3					125	125	0	0	0	1	2 2	1 1
126	126	0	0	0	0	2 2	1 3					126	126	0	0	0	1	2 2	1 3
127	127	0	0	0	0	2 4	1 3					127	127	0	0	0	1	2 2	1 3
128	128	0	0	0	0	2 2	1 3					128	128	0	0	0	1	2 4	1 3
129	129	0	0	0	0	2 2	1 3					129	129	0	0	0	1	2 2	1 1
130	130	0	0	0	0	2 2	1 3					130	130	0	0	0	1	2 2	1 1
131	131	0	0	0	0	2 4	1 3					131	131	0	0	0	1	2 2	1 1
132	132	0	0	0	0	2 2	1 3					132	132	0	0	0	1	2 2	1 3
133	133	0	0	0	0	2 2	1 1					133	133	0	0	0	1	2 2	1 3
134	134	0	0	0	0	2 4	1 3					134	134	0	0	0	1	2 2	1 3
135	135	0	0	0	0	2 2	1 1					135	135	0	0	0	1	2 2	1 3
136	136	0	0	0	0	2 2	1 1					136	136	0	0	0	1	2 2	1 1
137	137	0	0	0	0	2 2	1 3					137	137	0	0	0	1	2 2	3 3
138	138	0	0	0	0	2 2	1 3					138	138	0	0	0	1	2 2	1 1
139	139	0	0	0	0	2 2	1 3					139	139	0	0	0	1	2 2	1 1
140	140	0	0	0	0	2 2	1 3					140	140	0	0	0	1	2 2	1 1
141	141	0	0	0	0	4 4	3 3					141	141	0	0	0	1	2 2	1 1
142	142	0	0	0	0	2 2	1 3					142	142	0	0	0	1	2 4	1 3
143	143	0	0	0	0	2 4	1 3					143	143	0	0	0	1	2 4	1 3
144	144	0	0	0	0	2 2	1 3					144	144	0	0	0	1	2 4	1 3
145	145	0	0	0	0	2 2	1 3					145	145	0	0	0	1	4 4	1 3
146	146	0	0	0	0	2 4	1 3					146	146	0	0	0	1	2 2	1 3
147	147	0	0	0	0	2 2	1 3					147	147	0	0	0	1	2 2	1 3
148	148	0	0	0	0	2 4	1 3					148	148	0	0	0	1	2 2	1 1
149	149	0	0	0	0	2 4	3 3					149	149	0	0	0	1	2 2	1 1
150	150	0	0	0	0	2 4	3 3					150	150	0	0	0	1	2 4	1 3
151	151	0	0	0	0	4 4	1 3					151	151	0	0	0	1	2 4	1 3
152	152	0	0	0	0	2 2	1 3					152	152	0	0	0	1	2 2	1 1
153	153	0	0	0	0	2 2	1 3					153	153	0	0	0	1	2 2	1 1
154	154	0	0	0	0	2 4	3 3					154	154	0	0	0	1	2 2	1 1
155	155	0	0	0	0	2 2	1 3					155	155	0	0	0	1	2 2	1 1
156	156	0	0	0	0	2 4	3 3					156	156	0	0	0	1	2 2	1 1
157	157	0	0	0	0	2 2	1 3					157	157	0	0	0	1	2 2	1 3
158	158	0	0	0	0	2 2	1 3					158	158	0	0	0	1	2 2	1 3
159	159	0	0	0	0	2 4	1 3					159	159	0	0	0	1	2 2	1 3
160	160	0	0	0	0	2 2	1 3					160	160	0	0	0	1	4 4	3 3
161	161	0	0	0	0	2 2	1 1					161	161	0	0	0	1	2 2	1 3
162	162	0	0	0	0	2 4	1 3					162	162	0	0	0	1	2 2	1 1
163	163	0	0	0	0	2 2	1 1					163	163	0	0	0	1	2 2	1 1
164	164	0	0	0	0	2 4	1 3					164	164	0	0	0	1	2 2	1 1
165	165	0	0	0	0	2 2	1 1					165	165	0	0	0	1	2 2	3 3
166	166	0	0	0	0	2 2	1 3					166	166	0	0	0	1	2 2	1 1
167	167	0	0	0	0	2 2	1 3					167	167	0	0	0	1	2 2	1 1
168	168	0	0	0	0	2 4	1 1					168	168	0	0	0	1	2 2	1 3
169	169	0	0	0	0	2 2	1 1					169	169	0	0	0	1	2 2	1 3
170	170	0	0	0	0	2 2	1 1					170	170	0	0	0	1	2 2	1 3
171	171	0	0	0	0	2 2	1 1					171	171	0	0	0	1	2 2	1 1
172	172	0	0	0	0	2 4	1 3					172	172	0	0	0	1	2 2	1 3
173	173	0	0	0	0	2 2	1 1					173	173	0	0	0	1	2 2	1 3
174	174	0	0	0	0	2 2	1 1					174	174	0	0	0	1	2 4	1 3
175	175	0	0	0	0	2 2	1 1					175	175	0	0	0	1	2 4	1 3
176	176	0	0	0	0	2 4	1 3					176	176	0	0	0	1	2 2	1 3
177	177	0	0	0	0	2 2	1 1					177	177	0	0	0	1	2 2	1 1
178	178	0	0	0	0	2 4	1 3					178	178	0	0	0	1	2 2	1 1
179	179	0	0	0	0	2 2	1 1					179	179	0	0	0	1	2 2	1 3
180	180	0	0	0	0	2 2	1 1					180	180	0	0	0	1	2 2	1 3
181	181	0	0	0	0	2 4	1 1					181	181	0	0	0	1	2 2	1 3
182	182	0	0	0	0	2 2	1 1					182	182	0	0	0	1	2 2	1 3
183	183	0	0	0	0	4 4	1 3					183	183	0	0	0	1	2 2	1 3
184	184	0	0	0	0	2 4	1 1					184	184	0	0	0	1	2 2	1 3
185	185	0	0	0	0	2 2	1 1					185	185	0	0	0	1	2 2	1 3
186	186	0	0	0	0	2 2	1 3					186	186	0	0	0	1	2 2	1 3
187	187	0	0	0	0	2 2	1 3					187	187	0	0	0	1	2 2	1 3
188	188	0	0	0	0	2 2	1 1					188	188	0	0	0	1	2 2	1 3
189	189	0	0	0	0	2 2	1 1					189	189	0	0	0	1	2 2	1 3
190	190	0	0	0	0	2 2	1 1					190	190	0	0	0	1	2 2	1 1
191	191	0	0	0	0	2 2	1 1					191	191	0	0	0	1	2 2	1 1
192	192	0	0	0	0	2 2	1 1					192	192	0	0	0	1	2 2	1 3
193	193	0	0	0	0	2 4	1 1					193	193	0	0	0	1	4 4	3 3
194	194	0	0	0	0	2 2	1 1					194	194	0	0	0	1	2 2	1 3
195	195	0	0	0	0	2 4	1 1					195	195	0	0	0	1	2 2	1 3
196	196	0	0	0	0	2 2	1 3					196	196	0	0	0	1	2 2	1 1
197	197	0	0	0	0	2 2	1 3					197	197	0	0	0	1	2 4	1 3
198	198	0	0	0	0	2 4	1 3					198	198	0	0	0	1	2 4	1 3
199	199	0	0	0	0	2 4	1 3					199	199	0	0	0	1	2 2	1 3
200	200	0	0	0	0	2 2	1 3					200	200	0	0	0	1	2 4	1 3
201	201	0	0	0	0	2 4	1 3					201	201	0	0	0	1	2 4	1 3
202	202	0	0	0	0	2 2	1 3					202	202	0	0	0	1	2 2	1 1
203	203	0	0	0	0	2 2	1 1					203	203	0	0	0	1	2 4	1 3
204	204	0	0	0	0	2 4	1 3					204	204	0	0	0	1	4 4	3 3
205	205	0	0	0	0	2 4	1 3					205	205	0	0	0	1	2 2	1 1
206	206	0	0	0	0	2 2	1 1					206	206	0	0	0	1	2 2	1 3
207	207	0	0	0	0	4 4	3 3					207	207	0	0	0	1	4 4	1 3
208	208	0	0	0	0	2 2	1 1					208	208	0	0	0	1	2 4	1 3
209	209	0	0	0	0	2 2	1 1					209	209	0	0	0	1	2 2	1 3
210	210	0	0	0	0	2 2	1 3					210	210	0	0	0	1	2 2	1 3
211	211	0	0	0	0	2 2	1 1					211	211	0	0	0	1	4 4	1 3
212	212	0	0	0	0	2 2	1 1					212	212	0	0	0	1	2 2	1 3
213	213	0	0	0	0	2 4	1 1					213	213	0	0	0	1	2 2	1 3
214	214	0	0	0	0	2 2	1 3					214	214	0	0	0	1	2 2	1 3
215	215	0	0	0	0	2 2	1 3					215	215	0	0	0	1	2 4	1 3
216	216	0	0	0	0	2 2	1 3					216	216	0	0	0	1	4 4	1 3
217	217	0	0	0	0	2 4	1 1					217	217	0	0	0	1	2 2	1 3
218	218	0	0	0	0	2 2	1 3					218	218	0	0	0	1	2 2	1 3
219	219	0	0	0	0	2 2	1 3					219	219	0	0	0	1	2 4	1 3
220	220	0	0	0	0	2 2	1 3					220	220	0	0	0	1	4 4	1 3
221	221	0	0	0	0	2 2	1 3					221	221	0	0	0	1	2 4	1 3
222	222	0	0	0	0	2 2	1 3					222	222	0	0	0	1	2 2	1 1
223	223	0	0	0	0	2 2	1 3					223	223	0	0	0	1	2 2	1 1
224	224	0	0	0	0	2 2	1 1					224	224	0	0	0	1	4 4	3 3
225	225	0	0	0	0	2 2	1 1					225	225	0	0	0	1	2 4	1 3
226	226	0	0	0	0	2 2	1 1					226	226	0	0	0	1	2 2	1 3
227	227	0	0	0	0	2 2	1 1					227	227	0	0	0	1	2 2	1 3
228	228	0	0	0	0	2 4	1 1					228	228	0	0	0	1	4 4	1 3
229	229	0	0	0	0	2 4	1 1					229	229	0	0	0	1	2 2	1 3
230	230	0	0	0	0	2 2	1 3					230	230	0	0	0	1	2 4	1 3
231	231	0	0	0	0	2 4	1 3					231	231	0	0	0	1	2 2	1 3
232	232	0	0	0	0	2 4	1 3					232	232	0	0	0	1	2 2	1 3
233	233	0	0	0	0	2 2	1 3					233	233	0	0	0	1	4 4	1 3
234	234	0	0	0	0	4 4	1 3					234	234	0	0	0	1	2 2	1 1
235	235	0	0	0	0	2 2	1 3					235	235	0	0	0	1	2 4	1 3
236	236	0	0	0	0	2 2	1 3					236	236	0	0	0	1	2 4	1 3
237	237	0	0	0	0	2 2	1 3					237	237	0	0	0	1	2 4	1 3
238	238	0	0	0	0	2 2	1 3					238	238	0	0	0	1	2 2	1 1
239	239	0	0	0	0	2 2	1 3					239	239	0	0	0	1	2 4	1 3
240	240	0	0	0	0	2 2	1 3					240	240	0	0	0	1	2 4	1 3
241	241	0	0	0	0	2 2	1 3					241	241	0	0	0	1	2 2	1 1
242	242	0	0	0	0	2 2	1 3					242	242	0	0	0	1	2 2	1 1
243	243	0	0	0	0	2 2	1 1					243	243	0	0	0	1	2 4	1 3
244	244	0	0	0	0	2 2	1 1					244	244	0	0	0	1	4 4	1 3
245	245	0	0	0	0	2 4	1 3					245	245	0	0	0	1	2 4	3 3
246	246	0	0	0	0	2 2	1 1					246	246	0	0	0	1	2 2	1 1
247	247	0	0	0	0	2 2	1 1					247	247	0	0	0	1	2 4	1 3
248	248	0	0	0	0	2 4	1 3					248	248	0	0	0	1	2 2	1 1
249	249	0	0	0	0	2 2	1 1					249	249	0	0	0	1	2 4	1 3
250	250	0	0	0	0	2 2	1 1					250	250	0	0	0	1	2 2	1 3
251	251	0	0	0	0	2 4	1 3					251	251	0	0	0	1	2 4	1 3
252	252	0	0	0	0	2 2	1 1					252	252	0	0	0	1	2 2	1 1
253	253	0	0	0	0	2 2	1 3					253	253	0	0	0	1	2 2	1 1
254	254	0	0	0	0	2 2	1 3					254	254	0	0	0	1	2 4	1 3
255	255	0	0	0	0	2 2	1 3					255	255	0	0	0	1	4 4	1 3
256	256	0	0	0	0	2 2	1 3					256	256	0	0	0	1	2 2	1 3
257	257	0	0	0	0	2 2	1 3					257	257	0	0	0	1	2 4	1 1
258	258	0	0	0	0	2 2	1 3					258	258	0	0	0	1	2 2	1 1
259	259	0	0	0	0	2 4	1 3					259	259	0	0	0	1	2 4	1 3
260	260	0	0	0	0	2 2	1 3					260	260	0	0	0	1	2 2	1 1
261	261	0	0	0	0	2 2	1 3					261	261	0	0	0	1	2 4	1 3
262	262	0	0	0	0	2 2	1 3					262	262	0	0	0	1	4 4	1 3
263	263	0	0	0	0	2 2	1 3					263	263	0	0	0	1	2 2	1 3
264	264	0	0	0	0	2 2	1 3					264	264	0	0	0	1	2 2	1 1
265	265	0	0	0	0	2 2	1 3					265	265	0	0	0	1	2 4	1 3
266	266	0	0	0	0	2 2	1 3					266	266	0	0	0	1	2 4	1 1
267	267	0	0	0	0	2 2	1 3					267	267	0	0	0	1	2 2	1 1
268	268	0	0	0	0	2 2	1 3					268	268	0	0	0	1	2 2	3 3
269	269	0	0	0	0	2 4	1 1					269	269	0	0	0	1	2 4	1 3
270	270	0	0	0	0	2 2	1 3					270	270	0	0	0	1	2 4	1 3
271	271	0	0	0	0	2 2	1 3					271	271	0	0	0	1	2 2	1 3
272	272	0	0	0	0	2 2	1 3					272	272	0	0	0	1	2 4	1 3
273	273	0	0	0	0	2 4	1 1					273	273	0	0	0	1	2 2	1 3
274	274	0	0	0	0	2 2	1 1					274	274	0	0	0	1	4 4	1 3
275	275	0	0	0	0	2 2	1 1					275	275	0	0	0	1	2 4	1 3
276	276	0	0	0	0	4 4	1 3					276	276	0	0	0	1	2 4	3 3
277	277	0	0	0	0	2 2	1 1					277	277	0	0	0	1	2 2	1 3
278	278	0	0	0	0	2 2	1 1					278	278	0	0	0	1	2 2	1 3
279	279	0	0	0	0	2 4	1 1					279	279	0	0	0	1	2 4	1 3
280	280	0	0	0	0	2 4	1 1					280	280	0	0	0	1	2 2	1 3
281	281	0	0	0	0	2 2	1 1					281	281	0	0	0	1	2 4	1 3
282	282	0	0	0	0	2 4	1 3					282	282	0	0	0	1	2 2	1 3
283	283	0	0	0	0	2 2	1 3					283	283	0	0	0	1	2 4	1 3
284	284	0	0	0	0	2 4	1 3					284	284	0	0	0	1	2 4	1 3
285	285	0	0	0	0	2 2	1 3					285	285	0	0	0	1	4 4	1 3
286	286	0	0	0	0	2 2	1 3					286	286	0	0	0	1	2 2	1 3
287	287	0	0	0	0	2 2	1 1					287	287	0	0	0	1	2 2	1 3
288	288	0	0	0	0	2 4	1 3					288	288	0	0	0	1	2 4	1 3
289	289	0	0	0	0	2 2	1 1					289	289	0	0	0	1	2 2	1 3
290	290	0	0	0	0	2 2	1 1					290	290	0	0	0	1	2 2	1 1
291	291	0	0	0	0	2 4	1 3					291	291	0	0	0	1	2 4	3 3
292	292	0	0	0	0	2 2	1 1					292	292	0	0	0	1	2 4	1 3
293	293	0	0	0	0	4 4	3 3					293	293	0	0	0	1	2 2	1 3
294	294	0	0	0	0	2 2	1 1					294	294	0	0	0	1	2 2	1 3
295	295	0	0	0	0	2 2	1 1					295	295	0	0	0	1	2 4	3 3
296	296	0	0	0	0	2 2	1 1					296	296	0	0	0	1	2 2	1 3
297	297	0	0	0	0	2 2	1 1					297	297	0	0	0	1	4 4	3 3
298	298	0	0	0	0	2 4	1 3					298	298	0	0	0	1	2 4	1 3
299	299	0	0	0	0	2 2	1 1					299	299	0	0	0	1	2 4	1 3
300	300	0	0	0	0	2 4	1 3					300	300	0	0	0	1	2 4	1 3

## Sheet: MDR 
C242T	A930G	ID
C/C	A/A	0
C/C	A/A	0
T/T	G/G	0
C/T	A/G	0
T/T	G/G	0
C/C	A/A	0
C/C	A/G	0
C/C	A/G	0
C/C	A/G	0
C/C	A/G	0
C/C	A/G	0
C/C	A/G	0
C/T	A/G	0
C/T	A/G	0
T/T	A/G	0
C/T	A/G	0
C/T	A/G	0
C/T	A/G	0
T/T	G/G	0
C/C	A/G	0
C/T	A/G	0
C/C	A/G	0
C/T	A/G	0
C/T	A/G	0
C/C	A/G	0
C/C	A/G	0
C/C	A/G	0
C/C	A/G	0
C/C	A/G	0
T/T	G/G	0
C/T	A/G	0
C/C	A/G	0
C/T	A/G	0
C/C	A/G	0
C/T	A/G	0
C/C	A/G	0
C/C	A/G	0
C/C	A/G	0
T/T	A/G	0
C/C	A/A	0
C/C	A/A	0
C/T	A/A	0
C/T	A/A	0
C/C	A/G	0
C/C	A/G	0
C/C	A/G	0
C/C	A/G	0
C/C	A/G	0
T/T	G/G	0
C/C	A/G	0
C/C	A/G	0
C/C	A/G	0
C/C	A/G	0
C/T	A/G	0
C/C	A/G	0
C/T	A/G	0
C/C	A/G	0
C/C	A/G	0
C/T	A/G	0
T/T	G/G	0
C/C	A/G	0
C/C	A/G	0
C/T	A/G	0
C/C	A/G	0
C/C	A/G	0
C/C	A/G	0
C/C	A/G	0
C/C	A/G	0
C/C	A/G	0
C/T	A/G	0
T/T	G/G	0
C/C	A/G	0
C/T	A/G	0
C/C	A/G	0
C/C	A/G	0
C/T	A/G	0
C/C	A/G	0
C/T	A/G	0
C/C	A/G	0
C/C	A/G	0
C/T	A/G	0
C/C	A/A	0
C/C	A/A	0
T/T	G/G	0
C/C	A/A	0
C/T	A/A	0
C/C	A/G	0
C/T	A/G	0
C/T	A/G	0
C/C	A/G	0
C/C	A/G	0
C/T	A/G	0
C/C	A/G	0
C/C	A/G	0
T/T	A/G	0
C/C	A/G	0
C/T	G/G	0
C/C	A/G	0
C/T	G/G	0
C/T	G/G	0
C/C	A/A	0
T/T	A/G	0
C/C	A/A	0
C/T	G/G	0
T/T	A/G	0
C/C	A/G	0
C/T	G/G	0
C/C	A/A	0
C/T	G/G	0
C/C	A/A	0
C/C	A/G	0
C/C	A/G	0
C/T	A/A	0
C/C	A/A	0
C/T	G/G	0
C/C	A/A	0
C/C	A/G	0
C/C	A/G	0
C/C	A/G	0
C/C	A/G	0
C/C	A/G	0
C/C	A/G	0
T/T	G/G	0
C/C	A/G	0
C/T	A/G	0
C/C	A/G	0
C/T	A/G	0
C/C	A/G	0
C/C	A/G	0
C/C	A/G	0
C/T	A/G	0
C/C	A/G	0
C/C	A/A	0
C/T	A/G	0
C/C	A/A	0
C/C	A/A	0
C/C	A/G	0
C/C	A/G	0
C/C	A/G	0
C/C	A/G	0
T/T	G/G	0
C/C	A/G	0
C/T	A/G	0
C/C	A/G	0
C/C	A/G	0
C/T	A/G	0
C/C	A/G	0
C/T	A/G	0
C/T	G/G	0
C/T	G/G	0
T/T	A/G	0
C/C	A/G	0
C/C	A/G	0
C/T	G/G	0
C/C	A/G	0
C/T	G/G	0
C/C	A/G	0
C/C	A/G	0
C/T	A/G	0
C/C	A/G	0
C/C	A/A	0
C/T	A/G	0
C/C	A/A	0
C/T	A/G	0
C/C	A/A	0
C/C	A/G	0
C/C	A/G	0
C/T	A/A	0
C/C	A/A	0
C/C	A/A	0
C/C	A/A	0
C/T	A/G	0
C/C	A/A	0
C/C	A/A	0
C/C	A/A	0
C/T	A/G	0
C/C	A/A	0
C/T	A/G	0
C/C	A/A	0
C/C	A/A	0
C/T	A/A	0
C/C	A/A	0
T/T	A/G	0
C/T	A/A	0
C/C	A/A	0
C/C	A/G	0
C/C	A/G	0
C/C	A/A	0
C/C	A/A	0
C/C	A/A	0
C/C	A/A	0
C/C	A/A	0
C/T	A/A	0
C/C	A/A	0
C/T	A/A	0
C/C	A/G	0
C/C	A/G	0
C/T	A/G	0
C/T	A/G	0
C/C	A/G	0
C/T	A/G	0
C/C	A/G	0
C/C	A/A	0
C/T	A/G	0
C/T	A/G	0
C/C	A/A	0
T/T	G/G	0
C/C	A/A	0
C/C	A/A	0
C/C	A/G	0
C/C	A/A	0
C/C	A/A	0
C/T	A/A	0
C/C	A/G	0
C/C	A/G	0
C/C	A/G	0
C/T	A/A	0
C/C	A/G	0
C/C	A/G	0
C/C	A/G	0
C/C	A/G	0
C/C	A/G	0
C/C	A/G	0
C/C	A/A	0
C/C	A/A	0
C/C	A/A	0
C/C	A/A	0
C/T	A/A	0
C/T	A/A	0
C/C	A/G	0
C/T	A/G	0
C/T	A/G	0
C/C	A/G	0
T/T	A/G	0
C/C	A/G	0
C/C	A/G	0
C/C	A/G	0
C/C	A/G	0
C/C	A/G	0
C/C	A/G	0
C/C	A/G	0
C/C	A/G	0
C/C	A/A	0
C/C	A/A	0
C/T	A/G	0
C/C	A/A	0
C/C	A/A	0
C/T	A/G	0
C/C	A/A	0
C/C	A/A	0
C/T	A/G	0
C/C	A/A	0
C/C	A/G	0
C/C	A/G	0
C/C	A/G	0
C/C	A/G	0
C/C	A/G	0
C/C	A/G	0
C/T	A/G	0
C/C	A/G	0
C/C	A/G	0
C/C	A/G	0
C/C	A/G	0
C/C	A/G	0
C/C	A/G	0
C/C	A/G	0
C/C	A/G	0
C/C	A/G	0
C/T	A/A	0
C/C	A/G	0
C/C	A/G	0
C/C	A/G	0
C/T	A/A	0
C/C	A/A	0
C/C	A/A	0
T/T	A/G	0
C/C	A/A	0
C/C	A/A	0
C/T	A/A	0
C/T	A/A	0
C/C	A/A	0
C/T	A/G	0
C/C	A/G	0
C/T	A/G	0
C/C	A/G	0
C/C	A/G	0
C/C	A/A	0
C/T	A/G	0
C/C	A/A	0
C/C	A/A	0
C/T	A/G	0
C/C	A/A	0
T/T	G/G	0
C/C	A/A	0
C/C	A/A	0
C/C	A/A	0
C/C	A/A	0
C/T	A/G	0
C/C	A/A	0
C/T	A/G	0
C/T	A/A	1
C/T	A/G	1
C/C	A/A	1
T/T	G/G	1
C/C	G/G	1
C/T	G/G	1
C/T	A/G	1
C/T	A/G	1
C/T	A/A	1
C/T	A/G	1
C/T	A/A	1
C/T	A/G	1
C/C	A/G	1
C/C	A/G	1
C/C	A/A	1
C/C	A/G	1
C/C	A/G	1
C/T	A/G	1
C/T	A/G	1
C/T	A/G	1
C/C	A/G	1
C/T	A/G	1
C/T	A/G	1
C/C	G/G	1
C/T	G/G	1
C/C	A/G	1
C/C	A/G	1
C/C	A/G	1
C/C	A/G	1
C/C	A/G	1
C/C	A/A	1
C/T	A/G	1
C/T	A/A	1
C/C	A/G	1
C/T	A/G	1
C/C	A/G	1
C/C	A/G	1
C/C	A/G	1
C/C	A/G	1
C/C	A/G	1
C/C	A/G	1
C/C	A/G	1
C/C	A/G	1
T/T	A/G	1
C/C	A/G	1
C/C	G/G	1
C/C	A/G	1
C/T	A/G	1
C/C	A/G	1
C/C	G/G	1
T/T	A/G	1
C/C	G/G	1
C/T	A/G	1
C/T	A/G	1
C/T	A/G	1
C/C	A/G	1
C/T	A/G	1
C/T	A/G	1
C/T	A/G	1
C/C	G/G	1
C/T	A/G	1
C/C	A/G	1
C/C	G/G	1
T/T	A/G	1
C/T	G/G	1
C/C	G/G	1
C/C	G/G	1
C/C	A/G	1
C/C	A/G	1
C/C	A/G	1
C/C	A/G	1
T/T	A/G	1
C/C	A/G	1
C/T	A/G	1
C/T	G/G	1
C/C	A/G	1
C/C	G/G	1
C/C	G/G	1
C/C	A/G	1
C/T	A/G	1
C/C	A/G	1
C/C	A/G	1
C/C	A/G	1
C/T	A/G	1
C/C	A/G	1
C/C	A/G	1
C/T	A/G	1
T/T	G/G	1
C/C	A/G	1
C/T	A/G	1
C/T	A/G	1
C/C	A/G	1
T/T	G/G	1
C/C	A/G	1
C/C	A/G	1
T/T	A/G	1
C/T	A/G	1
T/T	A/G	1
C/T	A/G	1
C/T	A/G	1
C/T	G/G	1
C/T	A/G	1
C/C	A/G	1
C/C	A/G	1
C/T	A/G	1
C/C	A/A	1
C/C	A/G	1
C/T	A/A	1
C/T	A/A	1
T/T	G/G	1
C/T	G/G	1
C/C	A/A	1
T/T	G/G	1
C/T	A/G	1
C/T	A/A	1
C/C	A/A	1
C/T	A/G	1
C/C	A/A	1
C/C	A/A	1
C/T	A/G	1
C/C	G/G	1
C/T	A/G	1
T/T	G/G	1
C/T	A/A	1
C/C	A/A	1
C/C	A/G	1
C/C	A/G	1
C/T	A/G	1
C/C	A/A	1
C/C	A/A	1
C/C	A/A	1
C/C	A/G	1
C/C	A/G	1
C/C	A/G	1
C/C	A/G	1
C/C	A/A	1
C/C	G/G	1
C/C	A/A	1
C/C	A/A	1
C/C	A/A	1
C/C	A/A	1
C/T	A/G	1
C/T	A/G	1
C/T	A/G	1
T/T	A/G	1
C/C	A/G	1
C/C	A/G	1
C/C	A/A	1
C/C	A/A	1
C/T	A/G	1
C/T	A/G	1
C/C	A/A	1
C/C	A/A	1
C/C	A/A	1
C/C	A/A	1
C/C	A/A	1
C/C	A/G	1
C/C	A/G	1
C/C	A/G	1
T/T	G/G	1
C/C	A/G	1
C/C	A/A	1
C/C	A/A	1
C/C	A/A	1
C/C	G/G	1
C/C	A/A	1
C/C	A/A	1
C/C	A/G	1
C/C	A/G	1
C/C	A/G	1
C/C	A/A	1
C/C	A/G	1
C/C	A/G	1
C/T	A/G	1
C/T	A/G	1
C/C	A/G	1
C/C	A/A	1
C/C	A/A	1
C/C	A/G	1
C/C	A/G	1
C/C	A/G	1
C/C	A/G	1
C/C	A/G	1
C/C	A/G	1
C/C	A/G	1
C/C	A/G	1
C/C	A/G	1
C/C	A/G	1
C/C	A/G	1
C/C	A/A	1
C/C	A/A	1
C/C	A/G	1
T/T	G/G	1
C/C	A/G	1
C/C	A/G	1
C/C	A/A	1
C/T	A/G	1
C/T	A/G	1
C/C	A/G	1
C/T	A/G	1
C/T	A/G	1
C/C	A/A	1
C/T	A/G	1
T/T	G/G	1
C/C	A/A	1
C/C	A/G	1
T/T	A/G	1
C/T	A/G	1
C/C	A/G	1
C/C	A/G	1
T/T	A/G	1
C/C	A/G	1
C/C	A/G	1
C/C	A/G	1
C/T	A/G	1
T/T	A/G	1
C/C	A/G	1
C/C	A/G	1
C/T	A/G	1
T/T	A/G	1
C/T	A/G	1
C/C	A/A	1
C/C	A/A	1
T/T	G/G	1
C/T	A/G	1
C/C	A/G	1
C/C	A/G	1
T/T	A/G	1
C/C	A/G	1
C/T	A/G	1
C/C	A/G	1
C/C	A/G	1
T/T	A/G	1
C/C	A/A	1
C/T	A/G	1
C/T	A/G	1
C/T	A/G	1
C/C	A/A	1
C/T	A/G	1
C/T	A/G	1
C/C	A/A	1
C/C	A/A	1
C/T	A/G	1
T/T	A/G	1
C/T	G/G	1
C/C	A/A	1
C/T	A/G	1
C/C	A/A	1
C/T	A/G	1
C/C	A/G	1
C/T	A/G	1
C/C	A/A	1
C/C	A/A	1
C/T	A/G	1
T/T	A/G	1
C/C	A/G	1
C/T	A/A	1
C/C	A/A	1
C/T	A/G	1
C/C	A/A	1
C/T	A/G	1
T/T	A/G	1
C/C	A/G	1
C/C	A/A	1
C/T	A/G	1
C/T	A/A	1
C/C	A/A	1
C/C	G/G	1
C/T	A/G	1
C/T	A/G	1
C/C	A/G	1
C/T	A/G	1
C/C	A/G	1
T/T	A/G	1
C/T	A/G	1
C/T	G/G	1
C/C	A/G	1
C/C	A/G	1
C/T	A/G	1
C/C	A/G	1
C/T	A/G	1
C/C	A/G	1
C/T	A/G	1
C/T	A/G	1
T/T	A/G	1
C/C	A/G	1
C/C	A/G	1
C/T	A/G	1
C/C	A/G	1
C/C	A/A	1
C/T	G/G	1
C/T	A/G	1
C/C	A/G	1
C/C	A/G	1
C/T	G/G	1
C/C	A/G	1
T/T	G/G	1
C/T	A/G	1
C/T	A/G	1
C/C	A/G	1
